# Supplementary material for: Dietary Inflammatory Index and Its Relationship with Cervical Carcinogenesis Risk in Korean Women: A Case-Control Study
Source: PubMed Central journal article supplement (PMC6721526; doi:10.3390/cancers11081108), 2019-08-03

## Supplementary Material: Dietary Inflammatory Index and Its Relationship with Cervical Carcinogenesis Risk in Korean Women: A Case-Control Study

Sundara Raj Sreeja, Hyun Yi Lee, Minji Kwon, Nitin Shivappa, James R. Hebert and Mi Kyung Kim

**Table S1.** Odds ratios (ORs) of CINs and cervical cancer for quintiles of 24 anti-inflammatory food and nutrient parameters.

| DII Component  | Anti-Inflammatory Food and Nutrient Parameters |     |                  |                  |                  | <i>p</i> for Trends <sup>a</sup> |        |
|----------------|------------------------------------------------|-----|------------------|------------------|------------------|----------------------------------|--------|
|                | Q1                                             | Q2  | Q3               | Q4               | Q5               |                                  |        |
| n3 fatty acids | CIN1                                           | ref | 1.11 (0.73–1.67) | 0.87 (0.57–1.33) | 0.74 (0.48–1.15) | 0.70 (0.45–1.09)                 | 0.02   |
|                | CIN2/3                                         | ref | 0.95 (0.58–1.55) | 1.27 (0.8–2.020) | 0.75 (0.45–1.27) | 0.77 (0.46–1.29)                 | 0.23   |
|                | CC                                             | ref | 0.91 (0.56–1.47) | 0.98 (0.61–1.58) | 0.85 (0.52–1.41) | 0.91 (0.55–1.50)                 | 0.63   |
| n6 fatty acids | CIN1                                           | ref | 1.06 (0.69–1.64) | 1.12 (0.73–1.73) | 0.83 (0.53–1.30) | 0.63 (0.39–1.01)                 | 0.03   |
|                | CIN2/3                                         | ref | 1.37 (0.86–2.18) | 1.03 (0.63–1.68) | 0.59 (0.34–1.02) | 0.66 (0.38–1.15)                 | 0.01   |
|                | CC                                             | ref | 1.16 (0.74–1.83) | 0.97 (0.60–1.57) | 0.79 (0.47–1.33) | 0.74 (0.43–1.27)                 | 0.10   |
| MUFA           | CIN1                                           | ref | 0.86 (0.55–1.36) | 1.19 (0.77–1.85) | 0.88 (0.56–1.38) | 0.66 (0.41–1.07)                 | 0.13   |
|                | CIN2/3                                         | ref | 1.09 (0.66–1.80) | 1.15 (0.69–1.91) | 1.07 (0.64–1.79) | 0.74 (0.42–1.30)                 | 0.33   |
|                | CC                                             | ref | 1.06 (0.68–1.67) | 0.93 (0.57–1.52) | 0.98 (0.59–1.65) | 0.65 (0.36–1.15)                 | 0.16   |
| Vitamin A      | CIN1                                           | ref | 0.95 (0.61–1.48) | 1.12 (0.73–1.73) | 0.87 (0.55–1.38) | 1.39 (0.91–2.13)                 | 0.19   |
|                | CIN2/3                                         | ref | 0.83 (0.54–1.29) | 0.65 (0.40–1.03) | 0.36 (0.21–0.63) | 0.40 (0.23–0.67)                 | <.0001 |
|                | CC                                             | ref | 0.75 (0.48–1.18) | 0.42 (0.26–0.69) | 0.30 (0.17–0.52) | 0.65 (0.40–1.03)                 | 0.001  |
| Carotene       | CIN1                                           | ref | 1.01 (0.65–1.56) | 1.03 (0.66–1.59) | 0.98 (0.63–1.53) | 1.41 (0.92–2.15)                 | 0.16   |
|                | CIN2/3                                         | ref | 0.76 (0.49–1.18) | 0.64 (0.40–1.01) | 0.35 (0.20–0.61) | 0.41 (0.24–0.69)                 | <.0001 |
|                | CC                                             | ref | 0.96 (0.62–1.50) | 0.41 (0.25–0.69) | 0.35 (0.20–0.61) | 0.66 (0.41–1.06)                 | 0.001  |
| Vitamin B1     | CIN1                                           | ref | 1.74 (1.10–2.74) | 1.40 (0.87–2.24) | 1.36 (0.85–2.19) | 1.74 (1.09–2.77)                 | 0.14   |
|                | CIN2/3                                         | ref | 0.87 (0.54–1.40) | 1.00 (0.63–1.59) | 0.66 (0.40–1.10) | 0.46 (0.26–0.81)                 | 0.01   |
|                | CC                                             | ref | 0.66 (0.42–1.06) | 0.71 (0.44–1.13) | 0.52 (0.31–0.88) | 0.65 (0.39–1.07)                 | 0.03   |
| Vitamin B2     | CIN1                                           | ref | 1.33 (0.84–2.08) | 1.28 (0.81–2.02) | 1.32 (0.84–2.08) | 1.12 (0.71–1.79)                 | 0.76   |
|                | CIN2/3                                         | ref | 0.94 (0.59–1.51) | 0.93 (0.58–1.51) | 0.76 (0.46–1.26) | 0.49 (0.28–0.85)                 | 0.01   |
|                | CC                                             | ref | 0.69 (0.43–1.11) | 0.90 (0.56–1.46) | 0.85 (0.51–1.41) | 0.78 (0.47–1.30)                 | 0.51   |
| Niacin         |                                                |     |                  |                  |                  |                                  |        |

|            |        |     |                  |                  |                  |                  |        |
|------------|--------|-----|------------------|------------------|------------------|------------------|--------|
| Vitamin B6 | CIN1   | ref | 0.83 (0.53–1.29) | 1.19 (0.78–1.81) | 0.79 (0.51–1.25) | 0.98 (0.63–1.54) | 0.89   |
|            | CIN2/3 | ref | 1.11 (0.68–1.83) | 1.44 (0.89–2.34) | 1.18 (0.71–1.97) | 0.65 (0.36–1.18) | 0.37   |
|            | CC     | ref | 1.03 (0.64–1.67) | 1.39 (0.87–2.22) | 1.00 (0.6–1.67)  | 0.77 (0.45–1.33) | 0.48   |
| PUFA       | CIN1   | ref | 1.1 (0.73–1.68)  | 0.89 (0.58–1.38) | 1.05 (0.68–1.61) | 0.82 (0.52–1.29) | 0.38   |
|            | CIN2/3 | ref | 0.94 (0.6–1.48)  | 1.02 (0.64–1.62) | 0.59 (0.35–1)    | 0.55 (0.32–0.95) | 0.01   |
|            | CC     | ref | 0.72 (0.45–1.16) | 0.89 (0.55–1.44) | 0.76 (0.47–1.26) | 0.74 (0.44–1.23) | 0.29   |
| Folic acid | CIN1   | ref | 0.92 (0.60–1.42) | 0.99 (0.65–1.53) | 0.81 (0.52–1.27) | 0.47 (0.29–0.77) | 0.01   |
|            | CIN2/3 | ref | 1.14 (0.70–1.84) | 1.05 (0.64–1.72) | 0.82 (0.49–1.38) | 0.68 (0.39–1.20) | 0.08   |
|            | CC     | ref | 1.17 (0.74–1.86) | 1.14 (0.70–1.84) | 1.08 (0.65–1.80) | 0.64 (0.36–1.15) | 0.21   |
| Vitamin C  | CIN1   | ref | 1.14 (0.75–1.76) | 1.19 (0.78–1.82) | 1.19 (0.78–1.81) | 0.75 (0.47–1.18) | 0.37   |
|            | CIN2/3 | ref | 0.88 (0.55–1.42) | 0.80 (0.49–1.31) | 0.71 (0.43–1.17) | 0.87 (0.54–1.42) | 0.36   |
|            | CC     | ref | 0.62 (0.38–1.01) | 0.74 (0.45–1.22) | 0.79 (0.48–1.29) | 1.05 (0.65–1.69) | 0.70   |
| Vitamin D  | CIN1   | ref | 0.88 (0.57–1.36) | 0.95 (0.62–1.46) | 0.86 (0.55–1.34) | 1.29 (0.85–1.95) | 0.29   |
|            | CIN2/3 | ref | 1.15 (0.75–1.76) | 0.57 (0.35–0.94) | 0.49 (0.29–0.83) | 0.35 (0.20–0.62) | <.0001 |
|            | CC     | ref | 0.96 (0.62–1.49) | 0.47 (0.28–0.78) | 0.31 (0.18–0.55) | 0.57 (0.35–0.92) | <.0001 |
| Vitamin E  | CIN1   | ref | 1.39 (0.85–2.26) | 1.69 (1.05–2.71) | 1.68 (1.04–2.71) | 1.65 (1.02–2.66) | 0.04   |
|            | CIN2/3 | ref | 1.81 (1.08–3.03) | 1.24 (0.72–2.12) | 1.62 (0.95–2.74) | 0.91 (0.51–1.63) | 0.57   |
|            | CC     | ref | 0.96 (0.6–1.52)  | 0.69 (0.41–1.14) | 0.81 (0.49–1.34) | 0.76 (0.46–1.27) | 0.17   |
| Fiber      | CIN1   | ref | 1.13 (0.72–1.76) | 1.2 (0.77–1.87)  | 1.33 (0.86–2.07) | 0.86 (0.54–1.39) | 0.87   |
|            | CIN2/3 | ref | 0.99 (0.62–1.58) | 0.98 (0.61–1.57) | 0.57 (0.33–0.97) | 0.64 (0.37–1.09) | 0.01   |
|            | CC     | ref | 0.75 (0.47–1.21) | 1.21 (0.76–1.93) | 0.97 (0.59–1.6)  | 0.57 (0.32–1.01) | 0.23   |
| Magnesium  | CIN1   | ref | 0.81 (0.52–1.24) | 0.99 (0.65–1.50) | 0.83 (0.53–1.29) | 1.21 (0.79–1.85) | 0.42   |
|            | CIN2/3 | ref | 0.94 (0.61–1.45) | 0.69 (0.44–1.10) | 0.36 (0.20–0.63) | 0.40 (0.23–0.69) | <.0001 |
|            | CC     | ref | 0.97 (0.61–1.56) | 0.68 (0.42–1.12) | 0.42 (0.24–0.72) | 0.62 (0.37–1.02) | 0.003  |
| Selenium   | CIN1   | ref | 0.82 (0.54–1.23) | 0.80 (0.53–1.20) | 0.64 (0.41–0.98) | 0.61 (0.39–0.95) | 0.013  |
|            | CIN2/3 | ref | 1.02 (0.65–1.59) | 0.64 (0.39–1.05) | 0.66 (0.4–1.10)  | 0.57 (0.34–0.98) | 0.01   |
|            | CC     | ref | 1.11 (0.68–1.81) | 0.74 (0.44–1.25) | 0.79 (0.47–1.34) | 1.14 (0.69–1.88) | 0.88   |
| Zinc       | CIN1   | ref | 1.06 (0.7–1.60)  | 0.98 (0.64–1.51) | 1.09 (0.70–1.70) | 1.01 (0.64–1.61) | 0.93   |
|            | CIN2/3 | ref | 1.20 (0.72–1.99) | 0.89 (0.51–1.53) | 1.59 (0.95–2.65) | 1.20 (0.70–2.05) | 0.30   |
|            | CC     | ref | 1.39 (0.74–2.6)  | 1.76 (0.96–3.23) | 1.99 (1.11–3.58) | 1.56 (0.85–2.85) | 0.11   |

|          |        |     |                  |                  |                  |                  |        |
|----------|--------|-----|------------------|------------------|------------------|------------------|--------|
| Garlic   | CIN1   | ref | 1.00 (0.66–1.50) | 1.02 (0.68–1.54) | 1.02 (0.67–1.56) | 0.54 (0.34–0.87) | 0.05   |
|          | CIN2/3 | ref | 1.05 (0.64–1.70) | 0.91 (0.55–1.50) | 1.11 (0.67–1.82) | 0.91 (0.55–1.52) | 0.82   |
|          | CC     | ref | 0.84 (0.49–1.44) | 0.91 (0.53–1.54) | 1.17 (0.71–1.95) | 1.29 (0.78–2.14) | 0.12   |
| Ginger   | CIN1   | ref | 1.10 (0.70–1.72) | 1.41 (0.90–2.19) | 1.15 (0.73–1.80) | 1.48 (0.95–2.31) | 0.10   |
|          | CIN2/3 | ref | 0.97 (0.61–1.53) | 0.72 (0.44–1.19) | 0.83 (0.52–1.34) | 0.51 (0.30–0.88) | 0.02   |
|          | CC     | ref | 1.05 (0.66–1.68) | 0.74 (0.45–1.22) | 0.58 (0.34–0.98) | 0.95 (0.59–1.55) | 0.24   |
| Onion    | CIN1   | ref | 1.17 (0.74–1.86) | 1.61 (1.04–2.50) | 0.98 (0.61–1.57) | 1.72 (1.11–2.67) | 0.06   |
|          | CIN2/3 | ref | 1.13 (0.72–1.76) | 0.89 (0.55–1.42) | 0.46 (0.27–0.79) | 0.53 (0.31–0.91) | 0.001  |
|          | CC     | ref | 1.08 (0.69–1.70) | 0.52 (0.31–0.88) | 0.34 (0.19–0.61) | 0.88 (0.55–1.41) | 0.03   |
| Pepper   | CIN1   | ref | 1.77 (1.08–2.91) | 2.07 (1.26–3.39) | 1.46 (0.87–2.45) | 1.83 (1.1–3.05)  | 0.15   |
|          | CIN2/3 | ref | 1.48 (0.88–2.47) | 1.12 (0.65–1.94) | 1.33 (0.77–2.30) | 1.26 (0.72–2.2)  | 0.64   |
|          | CC     | ref | 0.90 (0.56–1.45) | 1.12 (0.69–1.83) | 1.39 (0.84–2.30) | 0.98 (0.56–1.71) | 0.54   |
| Tea      | CIN1   | ref | 1.30 (0.85–1.97) | 0.96 (0.62–1.49) | 1.07 (0.69–1.66) | 1.05 (0.68–1.64) | 0.82   |
|          | CIN2/3 | ref | 1.22 (0.80–1.88) | 0.52 (0.31–0.87) | 0.51 (0.30–0.87) | 0.50 (0.29–0.86) | <.0001 |
|          | CC     | ref | 0.84 (0.53–1.34) | 0.79 (0.49–1.27) | 0.54 (0.32–0.92) | 0.53 (0.31–0.89) | 0.004  |
| Turmeric | CIN1   | ref | 0.86 (0.48–1.56) | 1.38 (0.95–2.00) | 1.10 (0.74–1.63) | 0.78 (0.51–1.18) | 0.55   |
|          | CIN2/3 | ref | 0.70 (0.34–1.48) | 1.18 (0.75–1.87) | 1.12 (0.69–1.80) | 1.66 (1.08–2.56) | 0.02   |
|          | CC     | ref | 0.71 (0.35–1.45) | 0.95 (0.60–1.50) | 1.15 (0.72–1.83) | 1.33 (0.85–2.06) | 0.18   |
|          | CIN1   | ref | 1.49 (0.92–2.43) | 1.22 (0.73–2.02) | 1.62 (0.99–2.64) | 2.17 (1.34–3.51) | 0.002  |
|          | CIN2/3 | ref | 1.55 (0.93–2.60) | 1.04 (0.59–1.81) | 1.12 (0.64–1.94) | 1.58 (0.92–2.70) | 0.37   |
|          | CC     | ref | 1.02 (0.65–1.60) | 0.84 (0.52–1.37) | 0.65 (0.38–1.11) | 0.96 (0.56–1.63) | 0.33   |

All DII components were adjusted to energy density (DII component/energy). <sup>a</sup> Full-adjusted model: adjusted for age (continuous), marriage (single, married, divorced), education level (middle school, high school, college), drinking (yes, no), pregnancy (yes, no), oral contraceptive use (yes, no), menopausal status (pre or peri menopause, post menopause) and BMI (continuous).

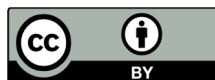

Supplement: cancers-11-01108-s001.pdf [file cancers-11-01108-s001.pdf]
